1 **An independent, multi-country head-to-head accuracy comparison of automated chest x-**  
2 **ray algorithms for the triage of pulmonary tuberculosis**

3  
4 William Worodria\*<sup>1</sup>, Robert Castro\*<sup>2,3</sup>, Sandra V. Kik<sup>4</sup>, Victoria Dalay<sup>5</sup>, Brigitta Derendinger<sup>6</sup>,  
5 Charles Festo<sup>7</sup>, Thanh Quoc Nguyen<sup>8,9</sup>, Mihaja Raberahona<sup>10,11</sup>, Swati Sudarsan<sup>2,3</sup>, Alfred  
6 Andama<sup>1</sup>, Balamugesh Thangakunam<sup>12</sup>, Issa Lyimo<sup>7</sup>, Viet Nhung Nguyen<sup>8,9</sup>, Rivo  
7 Rakotoarivelo<sup>11,13</sup>, Grant Theron<sup>6</sup>, Charles Yu<sup>5</sup>, Claudia M. Denkinge<sup>14,15</sup>, Simon Grandjean  
8 Lapierre<sup>16,17</sup>, Adithya Cattamanchi<sup>3,18</sup>, Devasahayam J. Christopher<sup>+10</sup>, Devan Jaganath<sup>+3,19</sup> for  
9 the R2D2 TB Network<sup>±</sup>

- 10 1. World Alliance for Lung and Intensive Care in Uganda, Kampala, Uganda  
11 2. Division of Pulmonary and Critical Care Medicine, University of California, San  
12 Francisco, San Francisco, USA  
13 3. Center for Tuberculosis, University of California, San Francisco, USA  
14 4. FIND, Geneva, Switzerland  
15 5. De La Salle Medical and Health Sciences Institute, Dasmarinas Cavite, Philippines  
16 6. DSI-NRF Centre of Excellence for Biomedical Tuberculosis Research, South African  
17 Medical Research Council Centre for Tuberculosis Research, Division of Molecular  
18 Biology and Human Genetics, Faculty of Medicine and Health Sciences, Stellenbosch  
19 University, South Africa  
20 7. Ifakara Health Institute, Dar es Salaam, Tanzania  
21 8. Vietnam National Tuberculosis Programme, National Lung Hospital, Hanoi, Vietnam  
22 9. VNU University of Medicine and Pharmacy, Hanoi, Vietnam  
23 10. Department of Infectious Diseases, CHU Joseph Raseta Befelatanana, Antananarivo,  
24 Madagascar  
25 11. Centre d'Infectiologie Charles Mérieux, Université d'Antananarivo, Antananarivo,  
26 Madagascar

- 27 12. Department of Pulmonary Medicine, Christian Medical College, Vellore, Tamil Nadu,  
28 India
- 29 13. Faculté de Médecine, Université de Fianarantsoa, Fianarantsoa, Madagascar
- 30 14. Department of Infectious Disease and Tropical Medicine, Center for Infectious Diseases,  
31 Heidelberg University Hospital, Heidelberg, Germany
- 32 15. German Center for Infection Research, partner site, Heidelberg, Germany
- 33 16. Centre de Recherche du Centre Hospitalier de l'Université de Montréal,  
34 Immunopathology Axis, Montréal, Canada
- 35 17. Université de Montréal, Department of Microbiology, Infectious Diseases and  
36 Immunology, Montréal, Canada
- 37 18. Division of Pulmonary Diseases and Critical Care Medicine, School of Medicine,  
38 University of California Irvine, Orange, USA
- 39 19. Division of Pediatric Infectious Diseases, University of California, San Francisco, San  
40 Francisco, USA
- 41
- 42 \*First authors contributed equally
- 43 +Senior authors contributed equally
- 44 ± See Supplemental Table 1 for additional R2D2 TB Network Contributors

45 Corresponding author

46 Adithya Cattamanchi

47 1001 Health Sciences Road

48 Irvine CA 92697-3950

49 (714) 456-2959

50 [acattama@hs.uci.edu](mailto:acattama@hs.uci.edu)

51 Word Count:

52 Abstract: 359

53 Text: 3,678

54 **ABSTRACT**

55 **Background.** Computer-aided detection (CAD) algorithms for automated chest X-ray (CXR)  
56 reading have been endorsed by the World Health Organization for tuberculosis (TB) triage, but  
57 independent, multi-country assessment and comparison of current products are needed to  
58 guide implementation.

59  
60 **Methods.** We conducted a head-to-head evaluation of five CAD algorithms for TB triage across  
61 seven countries. We included CXRs from adults who presented to outpatient facilities with at  
62 least two weeks of cough in India, Madagascar, the Philippines, South Africa, Tanzania,  
63 Uganda, and Vietnam. The participants completed a standard evaluation for pulmonary TB,  
64 including sputum collection for Xpert MTB/RIF Ultra and culture. Against a microbiological  
65 reference standard, we calculated and compared the accuracy overall, by country and key  
66 groups for five CAD algorithms: CAD4TB (Delft Imaging), INSIGHT CXR (Lunit), DrAid  
67 (Vinbrain), Genki (Deeptek), and qXR (qure.AI). We determined the area under the ROC curve  
68 (AUC) and if any CAD product could achieve the minimum target accuracy for a TB triage test  
69 ( $\geq 90\%$  sensitivity and  $\geq 70\%$  specificity). We then applied country- and population-specific  
70 thresholds and recalculated accuracy to assess any improvement in performance.

71  
72 **Results.** Of 3,927 individuals included, the median age was 41 years (IQR 29-54), 12.9% were  
73 people living with HIV (PLWH), 8.2% living with diabetes, and 21.2% had a prior history of TB.  
74 The overall AUC ranged from 0.774-0.819, and specificity ranged from 64.8-73.8% at 90%  
75 sensitivity. CAD4TB had the highest overall accuracy (73.8% specific, 95% CI 72.2-75.4, at 90%  
76 sensitivity), although qXR and INSIGHT CXR also achieved the target 70% specificity. There  
77 was heterogeneity in accuracy by country, and females and PLWH had lower sensitivity while  
78 males and people with a history of TB had lower specificity. The performance remained stable  
79 regardless of diabetes status. When country- and population-specific thresholds were applied,

80 at least one CAD product could achieve or approach the target accuracy for each country and  
81 sub-group, except for PLWH and those with a history of TB.

82

83 **Conclusions.** Multiple CAD algorithms can achieve or exceed the minimum target accuracy for  
84 a TB triage test, with improvement when using setting- or population-specific thresholds. Further  
85 efforts are needed to integrate CAD into routine TB case detection programs in high-burden  
86 communities.

## 87 INTRODUCTION

88 Triage tests for pulmonary tuberculosis (TB) are essential to increase access to TB-specific  
89 testing and prevent delays in diagnosis and treatment. Globally, an estimated 3.1 of the 10.6  
90 million TB cases are not reported to public health programs each year,<sup>1</sup> highlighting that missed  
91 diagnoses are a major contributor to morbidity, mortality and ongoing transmission. To address  
92 this case detection gap, providers and community health workers need the tools to quickly  
93 determine who are at higher risk of TB disease to facilitate access to TB-specific testing and  
94 treatment initiation.<sup>2</sup> Ideally, these triage tests should be sensitive, non-invasive and near the  
95 point-of-care.<sup>3</sup> However, there currently is no tool or assay that meets the World Health  
96 Organization (WHO) target product profile for a triage test for the general population.

97 Chest x-ray (CXR) is a sensitive and moderately specific approach to TB triage, but has  
98 been limited by the infrastructure and expertise requirements to obtain and interpret the CXR.  
99 Computer-aided detection (CAD) algorithms have been developed that utilize deep-learning  
100 methods to automatically interpret CXRs with a score output related to the likelihood of TB.<sup>4</sup>  
101 They can further be integrated with digital ultra-portable CXR machines that have limited  
102 infrastructure needs.<sup>5</sup> Several CAD CXR TB products are commercially available,<sup>6</sup> and overall  
103 have shown to be cost-effective with similar performance to human readers.<sup>2,7</sup> Consequently,  
104 the WHO has endorsed CAD algorithms for TB triage in adults.<sup>2</sup>

105 However, ongoing questions on the performance of CAD algorithms have limited their  
106 implementation. The majority of studies have focused on a single CAD platform, preventing  
107 head-to-head comparison of each algorithm overall and for key populations including people  
108 living with HIV (PLWH) and diabetes. Past studies have also used CXRs obtained with a digital  
109 x-ray machine, but current CAD algorithms can also analyze digitized images of CXRs obtained  
110 with an analog machine. Multiple analyses have found that the CAD threshold to classify TB  
111 may need to be adjusted for different settings and populations, but head-to-head comparisons

112 of CAD products with these thresholds have been limited to one or two countries,<sup>8,9</sup>  
113 retrospective meta-analyses,<sup>10</sup> or for the screening use-case.<sup>11,12</sup>

114 An independent, head-to-head comparison of the diagnostic accuracy of CAD algorithms  
115 in a large, diverse, multi-country cohort of individuals with presumptive pulmonary TB is needed  
116 to address these issues. We thus conducted a prospective diagnostic accuracy study across  
117 seven countries in sub-Saharan Africa, South Asia, and Southeast Asia. We independently  
118 determined and compared the accuracy of five CAD algorithms to detect pulmonary TB, overall  
119 and for key groups, and utilized universal (i.e., single) as well as setting- or population-specific  
120 threshold scores.

121

## 122 **METHODS**

### 123 *Settings and Participants*

124 Participants were enrolled as part of two prospective TB diagnostic accuracy studies, the Rapid  
125 Research in Diagnostics Development (R2D2) TB network,<sup>13</sup> and the Digital Cough Monitoring  
126 Project. We included adults 18 years and older with at least two weeks of new or worsening  
127 cough from outpatient centers from India, the Philippines, South Africa, Uganda, and Vietnam  
128 (R2D2 TB Network), and Madagascar and Tanzania (Digital Cough Monitoring Project) from  
129 2021-2023. We excluded individuals who had completed TB disease or infection treatment in  
130 the last 12 months, received antibiotics with anti-mycobacterial activity in the last 2 weeks, or  
131 were unable to return for follow-up visits. All participants completed a written informed consent,  
132 and the study was approved by the ethical review boards from Christian Medical College  
133 (Vellore, India), De La Salle Medical and Health Sciences Institute (Dasmariñas City,  
134 Philippines), Stellenbosch University (Cape Town, South Africa), Makerere University College of  
135 Health Sciences (Kampala, Uganda), the National Lung Hospital (Hanoi, Vietnam), Comité  
136 d'Éthique à la Recherche Biomédicale (Antananarivo, Madagascar), Ifakara Health Institute

137 (Ifakara, Tanzania), the Centre de Recherche du Centre Hospitalier de l'Université de Montréal  
138 (Montreal, Canada) and the University of California, San Francisco (San Francisco, USA).

139

#### 140 *Procedures*

141 At enrollment, all participants completed a questionnaire on demographics and clinical history,  
142 and received a standard TB evaluation by trained personnel. This included an antero-posterior  
143 (AP) or postero-anterior (PA) chest X-ray (CXR) and collection of up to three samples of  
144 expectorated or induced sputum for *Mycobacterium tuberculosis* complex testing using Xpert  
145 MTB/RIF Ultra (Xpert Ultra, Cepheid, Sunnyvale, USA) and mycobacterial culture (liquid or  
146 solid) using standard protocols at laboratories by trained staff who were blinded to the CAD  
147 results.<sup>14,15</sup> Individuals enrolled in the R2D2 TB Network returned after three months for follow-  
148 up clinical assessment, and repeat CXR and sputum-based mycobacterial testing was repeated  
149 if Xpert Ultra testing was negative at baseline.

150

#### 151 *CXR Digitization*

152 Digital x-ray machines were available in India, Madagascar, South Africa, Tanzania, and  
153 Vietnam. The Philippines site initially used an analog machine retrofitted for digital images, and  
154 then transitioned to a digital x-ray machine. An analog machine was used in Uganda until  
155 November 2022, and then transitioned to digital x-rays. Research staff were trained at each  
156 study site to upload CXRs to a secure cloud-based server. Digital CXRs were in Digital Imaging  
157 and Communications in Medicine (DICOM) format, while film-based CXRs were scanned into  
158 Joint Photographic Experts Group (JPEG) format. DICOM images had all identifying meta-data  
159 removed and JPEG images had all identifying data manually hidden prior to assessment. None  
160 of the CXRs had been used previously to train the CAD algorithms.

161

#### 162 *CAD Assessment*



163 We independently evaluated five CAD algorithms: CAD4TB version 7 (Delft Imaging, 's-  
164 Hertogenbosch, the Netherlands), INSIGHT CXR version 3.1.4.1 (Lunit, Seoul, South Korea),  
165 qXR version 4 (Qure.AI, Mumbai, India), Genki version 1.1 (DeepTek Medical Imaging Private  
166 Limited, Pune, India), and DrAid version 2.0.7-37 (VinBrain, Hanoi, Vietnam). Each CAD  
167 software was installed on an online server managed by FIND. CAD analysis was conducted by  
168 FIND, according to the developers' instructions. CAD developers had no access to the images,  
169 and no role in the study design, conduct, analysis or interpretation. Each algorithm was then  
170 applied to each image, with an output of a TB risk score that ranged from 0-1 (qXR, Genki,  
171 DrAid) or 0-100 (CAD4TB, INSIGHT CXR). All CXR images were submitted as DICOM  
172 formatted files. Original images in JPEG format were converted into DICOM format using the  
173 img2dcm tool from the dcmtoolkit (v3.6.6). Images that did not fulfill the DICOM features that  
174 were required for successful CAD software processing were subsequently modified using the  
175 dcmmodify tool (v3.6.6) from the dcmtoolkit before they were processed with the CAD software.  
176 The staff performing the assessment were blinded to TB status.

177

### 178 *Reference Standards*

179 Our primary analysis was based on a microbiological reference standard (MRS), defined as TB  
180 positive if a participant had a positive baseline Xpert Ultra or culture result, and TB negative if  
181 Xpert Ultra negative and at least two negative culture results. Two trace Xpert Ultra results were  
182 defined as TB positive. A participant was defined as indeterminate if they had no positive result  
183 and less than 2 negative cultures (e.g. due to contamination) and were excluded from the  
184 analysis.

185

### 186 *Statistical analyses*

187 We first described the cohort using summary statistics, overall and for each country. Using the  
188 CAD TB risk score output, for each algorithm we generated receiver operating characteristic

189 (ROC) curves and calculated the area under each ROC curve (AUC) with 95% confidence  
190 intervals (CIs). We determined the threshold that maximizes specificity at 90% sensitivity, to  
191 assess if the CAD algorithms could achieve the minimum target accuracy for a TB triage test  
192 ( $\geq 90\%$  sensitivity and  $\geq 70\%$  specificity). We defined this as the universal threshold as a single  
193 cutoff value that could be applied to all countries and subgroups. At the universal threshold, we  
194 calculated the sensitivity and specificity with exact binomial 95% CIs of each CAD algorithm,  
195 and compared the accuracy of the top-performing algorithm to the other algorithms using  
196 McNemar's test of paired proportions, with significance defined as a p-value  $< 0.05$ . We also  
197 calculated the accuracy of each algorithm by country and among key subgroups using the  
198 universal threshold, including sex, HIV status, diabetes status, and prior history of TB. We  
199 generated forest plots to evaluate heterogeneity in country- and group-specific accuracy and  
200 assessed if their 95% CIs overlapped with the overall estimate for each CAD algorithm. We then  
201 determined if a setting- or population-specific threshold would improve performance by  
202 generating ROC curves for each country and subgroup, and calculated the sensitivity and  
203 specificity at a threshold that maximized specificity at 90% sensitivity within that group. To  
204 enable a head-to-head comparison, we excluded participants who did not have valid results in  
205 all CAD platforms, or with indeterminate TB classifications. We presented our findings according  
206 to the Standards for Reporting of Diagnostic Accuracy Studies (STARD) criteria.<sup>16</sup> All analyses  
207 were conducted using Stata v. 16.1 (StataCorp, College Station, TX).

208

## 209 **RESULTS**

### 210 *Participant Characteristics*

211 In total, 4,431 participants were enrolled during the study period and had a baseline CXR  
212 analyzed by at least one CAD algorithm (**Figure 1**). Three hundred eight (7%) participants were  
213 excluded with indeterminate or missing TB status. Eight (0.2%) were missing a qXR result, 91  
214 (2.1%) had an invalid/error CAD4TB result and 111 (2.5%) had an invalid/error DrAid result. The

215 final number of participants included in the analysis was 3,927, with characteristics described in  
216 **Table 1**. The median age was 41 years (interquartile range (IQR) 29-54), 2,133 (54.3%) were  
217 male, and 831 (21.2%) had a prior history of TB. The HIV prevalence was 12.9%, and  
218 concentrated predominantly in South Africa, Uganda and Tanzania (480/505, 95%). Conversely,  
219 277/3,387 (8.2%) of the cohort had diabetes, based largely in India, the Philippines, and  
220 Vietnam (249/277, 89.9%). The microbiological confirmation prevalence was 22.8% (897/3927).  
221 About half (56.2%) of those who were Xpert Ultra positive (467/832) had a semi-quantitative  
222 level that was medium or high. This proportion was higher in Madagascar (75%) and Uganda  
223 (67%), and lower in Tanzania (25%).

224

#### 225 *Head-to-head comparison of CAD algorithm accuracy*

226 The ROC curves for each algorithm are shown in **Figure 2**. The AUCs were similar across CAD  
227 algorithms, ranging from 0.774-0.819. At 90% sensitivity, CAD4TB had the highest specificity at  
228 73.8% (95% CI 72.2-75.4), although qXR and INSIGHT CXR also achieved the minimum target  
229 of 70% specificity (**Table 2**) with similar AUCs across the three products (0.800-0.819). DrAid  
230 and Genki were less specific, at 67.9% and 64.8%, respectively. In pairwise comparison,  
231 CAD4TB was significantly more specific than the other algorithms ( $p < 0.001$ ), although the  
232 absolute difference ranged from 3.5-9% (**Table 2**).

233

#### 234 *The accuracy of CAD algorithms by country and subgroup – Universal threshold*

235 When stratified by country, we found heterogeneity in accuracy as shown in **Figure 3A** for the  
236 highest performing algorithm (CAD4TB) and in **Supplemental Figures 1A-4A** for the other  
237 algorithms. For CAD4TB, using the universal calculated threshold score of 36.31, sensitivity  
238 ranged from 80% to 95.5%, although the 95% CIs of each country overlapped or exceeded the  
239 overall estimate of 90%. Specificity ranged from 67% to 83.6%, and was reduced in Vietnam  
240 and Madagascar. South Africa was the only country achieving the minimum target accuracy for

241 a TB triage test with CAD4TB (Sensitivity 93.3% (95% CI 86.1-97.5) and specificity 71.6% (95%  
242 CI 66.8-76)) when using the universal threshold. Across the other algorithms, performance  
243 remained similar to the overall estimates of each CAD product in the Philippines, India and  
244 Tanzania. Specificity at the universal threshold was generally lower than the overall estimate in  
245 Vietnam for qXR and DrAid, but was improved with INSIGHT CXR and Genki. In Uganda,  
246 sensitivity was lower by qXR and INSIGHT CXR, and specificity was lower with DrAid. In South  
247 Africa, specificity was marginally reduced with INSIGHT CXR and Genki. In Madagascar,  
248 specificity was generally lower than the overall estimate for each CAD product except for DrAid.  
249 In India, specificity was improved with DrAid.

250  
251 We also found heterogeneity when the accuracy was assessed in key subgroups using the  
252 universal threshold (**Figure 3B** for CAD4TB, and **Supplemental Figures 1B-4B** for other  
253 algorithms). For CAD4TB, sensitivity was lower in females and people living with HIV (PLWH) ,  
254 while specificity was lower in males and those with a history of TB compared to the overall  
255 estimates. Sensitivity in people living with diabetes (PLWD) was similar to those without  
256 diabetes; specificity was slightly reduced to 69.4% (95% CI 64-74.4) in PLWD although still  
257 close to the minimum target accuracy. Trends were similar across algorithms, with generally  
258 lower sensitivity in females and PLWH, and lower specificity in males and those with a history of  
259 TB. There was no heterogeneity by diabetes status.

260  
261 *Application of Population-specific Thresholds*

262 As shown in **Figure 4** for CAD4TB and **Supplemental Table 2** for other algorithms, we applied  
263 country- and population-specific thresholds and determined the specificity at 90% sensitivity.  
264 Among countries that had a CAD4TB sensitivity of less than 90% (Philippines, Uganda, India,  
265 and Tanzania), increasing sensitivity with a country-specific threshold resulted in a lower  
266 specificity. For the Philippines, Uganda and India, the specificity remained within 10% of the

267 minimum target accuracy of 70% and ranged from 64.4-68.3%. Tanzania had the lowest  
268 sensitivity initially (80%) with CAD4TB, and so increasing its sensitivity to 90% lowered the  
269 specificity to 47.6% (95% CI 40.3-55). For Vietnam, South Africa, and Madagascar that had  
270 greater than 90% sensitivity when using the universal threshold, lowering the sensitivity allowed  
271 all three to exceed the minimum target specificity (range 76.7-80.9%). For most countries, at  
272 least one CAD product achieved the minimum target accuracy for a TB triage test. The  
273 specificity in Uganda was close to the target accuracy, with specificity ranging from 68.3-68.8%  
274 for CAD4TB, qXR and INSIGHT CXR. In Tanzania, qXR had the highest specificity of 64%  
275 (95% CI 56.7-70.9) at 90% sensitivity. INSIGHT CXR achieved the minimum target accuracy for  
276 a TB triage test for the greatest number of countries (5/7).

277

278 When group-specific thresholds were applied, the minimum target accuracy could be achieved  
279 or exceeded with CAD4TB for males, people without HIV, people with and without diabetes and  
280 people without history of TB. Increasing the sensitivity to 90% reduced the specificity of  
281 CAD4TB among females to 63.8% (95% CI 61.3-66.2) and PLHW to 46% (95% CI 41-51). A  
282 male-specific threshold improved the specificity to 73% (95% CI 70.7-75.3); however, a  
283 subgroup specific threshold for people with a history of TB was unable to substantially improve  
284 specificity which remained low (58.2%, 95% CI 54.1-62.2). Similar trends were seen in other  
285 algorithms. The highest specificity for females was with INSIGHT CXR, where females achieved  
286 close to the target accuracy at 68.8% specificity (95% CI 66.4-71.1), while PLWH reached 53%  
287 specificity (95% CI 48-58) at 90% sensitivity with qXR. CAD4TB achieved the highest specificity  
288 for people with a history of TB at 58.2%. CAD4TB was able to achieve or exceed the minimum  
289 target accuracy for a TB triage test for the greatest number of groups assessed (5/8).

290

291 **DISCUSSION**

292 Automated CXR reading with CAD algorithms have provided an innovative tool to support the  
293 triage of individuals being evaluated for pulmonary TB. With several commercial products  
294 available, clinical and public health programs need to decide which algorithm(s) to implement.  
295 We performed a large independent head-to-head assessment of CAD products across seven  
296 countries, and found that overall accuracy was similar and CAD4TB, qXR and INSIGHT CXR  
297 achieved the minimum WHO target accuracy for a TB triage test. There was heterogeneity in  
298 accuracy by country and among key subgroups that was overall similar across CAD algorithms;  
299 however, application of country- and population-specific thresholds achieved or approached the  
300 minimum target accuracy for at least one CAD product, though gaps remained among PLWH  
301 and those with a history of TB. These findings demonstrate that there are multiple CAD options  
302 that are valuable for TB triage, with good performance across countries and subgroups that can  
303 be further fine-tuned according to local demographics.

304  
305 The overall accuracy was comparable across CAD products, with CAD4TB having the highest  
306 specificity followed by qXR and INSIGHT CXR. This is similar to an individual patient data (IPD)  
307 meta-analysis of studies from four countries that found similar performance across CAD4TB,  
308 qXR and INSIGHT CXR.<sup>10</sup> Specificity was lower in that study (ranging 54-61% specificity at 90%  
309 sensitivity),<sup>10</sup> although older CAD versions were used in that study and have been shown to not  
310 perform as well as current algorithms.<sup>9</sup> It is encouraging that the current algorithms can achieve  
311 the minimum target accuracy for a TB triage test. One study compared Genki to other CAD  
312 algorithms and noted similar specificity to CAD4TB and qXR, while we found it to be overall less  
313 specific.<sup>11</sup> However, that study assessed CAD in a screening cohort and was conducted in  
314 Vietnam where we also found Genki had higher specificity, highlighting the importance to  
315 conduct a multi-country evaluation to assess performance. To our knowledge this is the first  
316 published work to assess and compare DrAid, and although lower accuracy than the above  
317 three algorithms, overall it performed well with 68% specificity at 90% sensitivity. While CAD4TB

318 was the highest performing algorithm, it should be noted that other studies have found it to be  
319 similar to INSIGHT CXR and qXR,<sup>8,11,17</sup> and CAD4TB had more invalid or error results. Our  
320 findings overall demonstrate that there are several CAD algorithms that can now achieve the  
321 minimum target accuracy for a TB triage test when compared across multiple countries and  
322 regions.

323  
324 When assessed by country and population, CAD performance was heterogenous. This has  
325 been well-described by previous studies that have compared CAD4TB, qXR and INSIGHT CXR  
326 and have found that accuracy varied by country, and was lower for females, PLWH, and history  
327 of TB.<sup>8,10-12,17,18</sup> Few studies have assessed CAD for PLWD; screening studies in Indonesia and  
328 Pakistan found that specificity was low at 17-42% at about 90% sensitivity for CAD4TB.<sup>19,20</sup> A  
329 separate study in Pakistan found that INSIGHT CXR had similar performance among those with  
330 and without diabetes (87% sensitivity and 60-64% specificity).<sup>21</sup> We found that the accuracy was  
331 stable among those with and without diabetes, and is encouraging that there are several CAD  
332 products that perform well for this at-risk population, especially in TB endemic regions with a  
333 higher diabetes prevalence such as South and Southeast Asia. Variation in CAD product  
334 performance by setting and subgroup likely reflects the methods and population used to train  
335 the models.<sup>8,12</sup> Differences between country cohorts may also explain differences in accuracy;  
336 for example, sensitivity was reduced in Tanzania where 75% had lower bacterial burden by  
337 Xpert semi-quantitative level. However, in South Africa which had a large proportion of people  
338 living with HIV and with a prior history of TB, performance was overall stable across algorithms.

339  
340 To address the heterogeneity, we applied country- or population-specific thresholds, and found  
341 that at least one CAD product could achieve or was close to the minimum target accuracy for a  
342 TB triage test for each country and most groups. This was an improvement in comparison to the  
343 IPD meta-analysis that was unable to substantially increase performance with country-specific



344 thresholds.<sup>10</sup> The exceptions were PLWH and those with a history of TB, likely due to the low  
345 sensitivity to detect lung abnormalities in PLWH who have paucibacillary disease, and low  
346 specificity among those with a history of TB given persistent abnormalities on imaging. It is  
347 important to note that similar variation has been seen in human readers of CXRs for TB,<sup>10,22</sup> and  
348 so there is still potential value in settings where providers do not have access to expert CXR  
349 reads and for improved reliability.

350

351 Our findings can help support programmatic decision-making in the implementation of CAD  
352 algorithms. In our multi-country analysis, there are currently several CAD algorithms available  
353 that could be utilized based on accuracy and consideration of the local demographics. Facilities  
354 and TB programs can consider then other factors including cost and infrastructure needs for  
355 each product. Moreover, each product may have other features that may be desirable to the  
356 program; for example, the CAD4TB version we evaluated provided an output of TB score and  
357 classification, while the other algorithms also indicated other abnormalities.<sup>6</sup> Regardless of the  
358 CAD algorithm, our findings support that current CAD products may need threshold adjustment  
359 prior to implementation. The WHO has developed a toolkit to guide local calibration,<sup>23</sup> and may  
360 be further supported by some of the CAD products. The thresholds we identified may be useful  
361 as a starting point, although updated versions of CAD algorithms may require re-assessment.  
362 Moreover, the chosen threshold should also be guided by the main goals of the program,  
363 balancing reduction in confirmatory testing with risk of missed cases, and considerations of  
364 cost-effectiveness.<sup>7,8,24</sup>

365

366 Our study independently assessed the accuracy of multiple CAD products in the greatest  
367 number of countries to date, overall and among key risk groups. We also included two  
368 algorithms (DrAid and Genki) that have not been compared in the triage use-case previously.  
369 CXRs were obtained from well-characterized cohorts, with a microbiological reference standard



370 that included culture to increase yield beyond Xpert alone. Previous studies have assessed  
371 digital CXRs alone, while our study included a mix of digital and analog images. There were  
372 some limitations. We did not compare CAD products to a human interpretation, which requires a  
373 panel of expert readers and standardized annotation given high inter-reader variability. This was  
374 outside the scope of our study, and has been well-assessed previously.<sup>8,10,11</sup> All participants had  
375 cough, and we would have benefited from including individuals who did not have cough and met  
376 other screening criteria for TB testing. Some data was not available in Tanzania and  
377 Madagascar, including diabetes status, which may have biased assessment of heterogeneity,  
378 although there was still East African representation from Uganda. We were not powered to  
379 assess threshold identification by both country and subgroup, though as above the threshold  
380 should be further guided by the overall demographics and goals of the program. CAD algorithms  
381 continue to be developed or optimized with new versions, and these will require future  
382 independent validation.<sup>25</sup>

383

## 384 **CONCLUSIONS**

385 Across seven countries in high TB-burden settings, we found that there are several CAD  
386 algorithms that achieved the WHO target accuracy for a TB triage test. The CAD products can  
387 be further tuned to achieve goal accuracy depending on the key demographics of interest.  
388 Further work is needed to improve performance in PLWH and those with a history of TB,  
389 including in combination with other triage tests. Thus, CAD for automated CXR reading has  
390 large potential to expand TB diagnosis and treatment globally, with greater focus now needed  
391 on the implementation factors to increase access to high-burden communities.

392 **ACKNOWLEDGEMENTS**

393 We acknowledge the patients who participated, and all the R2D2 TB Network and Digital Cough  
394 Monitoring study personnel.

395

396 **CONFLICTS OF INTEREST**

397 The authors declare no conflicts of interest.

398 The installation and use of the different CAD software evaluated in this manuscript was provided  
399 free of charge by all CAD vendors to FIND. CAD vendors did not have any role in the study  
400 design, data collection, analysis, the decision to publish or the preparation of the manuscript.

401

402 **FUNDING**

403 The R2D2 TB Network was supported by the National Institute of Allergy and Infectious  
404 Diseases of the National Institutes of Health under award number U01AI152087, and the Digital  
405 Cough Monitoring study was funded by the Patrick J. McGovern Foundation. SGL is supported  
406 by a Junior 1 Salary Award from the Fonds de Recherche Santé Québec. DJ is supported by  
407 funding by the National Institutes of Health (K23HL153581). GT acknowledges funding from the  
408 EDCTP2 programme supported by the European Union (RIA2018D-2509, PreFIT; RIA2018D-  
409 2493, SeroSelectTB; RIA2020I-3305, CAGE-TB) and the National Institutes of Health  
410 (D43TW010350; U01AI152087; U54EB027049; R01AI136894).

411

## REFERENCES

1. World Health Organization. Global Tuberculosis Report 2023. Geneva: WHO, 2023.
2. World Health Organization. WHO consolidated guidelines on tuberculosis. Module 2: screening – systematic screening for tuberculosis disease. Geneva: WHO, 2021. 2021.
3. World Health Organization. High priority target product profiles for new tuberculosis diagnostics: report of a consensus meeting, 28-29 April 2014, Geneva, Switzerland. 2014.
4. FIND. Digital Chest Radiography and Computer-Aided Detection (CAD) Solutions for Tuberculosis Diagnostics: Technology Landscape Analysis. FIND: Geneva, 2021.
5. Vo LNQ, Codlin A, Ngo TD, et al. Early Evaluation of an Ultra-Portable X-ray System for Tuberculosis Active Case Finding. *Trop Med Infect Dis* 2021; **6**(3).
6. STOP TB and FIND. AI4Hlth. 2021. <https://www.ai4hlth.org/>.
7. Bashir S, Kik SV, Ruhwald M, et al. Economic analysis of different throughput scenarios and implementation strategies of computer-aided detection software as a screening and triage test for pulmonary TB. *PLoS One* 2022; **17**(12): e0277393.
8. Qin ZZ, Ahmed S, Sarker MS, et al. Tuberculosis detection from chest x-rays for triaging in a high tuberculosis-burden setting: an evaluation of five artificial intelligence algorithms. *The Lancet Digital Health* 2021; **3**(9): e543-e54.
9. Qin ZZ, Barrett R, Ahmed S, et al. Comparing different versions of computer-aided detection products when reading chest X-rays for tuberculosis. *PLOS Digit Health* 2022; **1**(6): e0000067.
10. Tavaziva G, Harris M, Abidi SK, et al. Chest X-ray Analysis With Deep Learning-Based Software as a Triage Test for Pulmonary Tuberculosis: An Individual Patient Data Meta-Analysis of Diagnostic Accuracy. *Clin Infect Dis* 2022; **74**(8): 1390-400.
11. Codlin AJ, Dao TP, Vo LNQ, et al. Independent evaluation of 12 artificial intelligence solutions for the detection of tuberculosis. *Scientific Reports* 2021; **11**(1): 23895.

12. Gelaw SM, Kik SV, Ruhwald M, et al. Diagnostic accuracy of three computer-aided detection systems for detecting pulmonary tuberculosis on chest radiography when used for screening: Analysis of an international, multicenter migrants screening study. *PLOS Glob Public Health* 2023; **3**(7): e0000402.
13. Rapid Research in Diagnostics Development for TB Network (R2D2). <https://www.r2d2tbnetwork.org/> (accessed 19 June 2024).
14. Cepheid. Xpert MTB/RIF Ultra Package Insert. Sunnyvale: Cepheid, 2019. .
15. Global Laboratory Initiative. Mycobacteriology Laboratory Manual. Geneva: Stop TB Partnership, 2014. .
16. Cohen JF, Korevaar DA, Altman DG, et al. STARD 2015 guidelines for reporting diagnostic accuracy studies: explanation and elaboration. *BMJ Open* 2016; **6**(11): e012799.
17. Qin ZZ, Sander MS, Rai B, et al. Using artificial intelligence to read chest radiographs for tuberculosis detection: A multi-site evaluation of the diagnostic accuracy of three deep learning systems. *Sci Rep* 2019; **9**(1): 15000.
18. Scott AJ, Perumal T, Hohlfeld A, et al. Diagnostic Accuracy of Computer-Aided Detection During Active Case Finding for Pulmonary Tuberculosis in Africa: A Systematic Review and Meta-analysis. *Open forum infectious diseases* 2024; **11**(2): ofae020.
19. Koesoemadinata RC, Kranzer K, Livia R, et al. Computer-assisted chest radiography reading for tuberculosis screening in people living with diabetes mellitus. *Int J Tuberc Lung Dis* 2018; **22**(9): 1088-94.
20. Habib SS, Rafiq S, Zaidi SMA, et al. Evaluation of computer aided detection of tuberculosis on chest radiography among people with diabetes in Karachi Pakistan. *Sci Rep* 2020; **10**(1): 6276.
21. Tavaziva G, Majidulla A, Nazish A, et al. Diagnostic accuracy of a commercially available, deep learning-based chest X-ray interpretation software for detecting culture-

confirmed pulmonary tuberculosis. *International journal of infectious diseases : IJID : official publication of the International Society for Infectious Diseases* 2022; **122**: 15-20.

22. Maduskar P, Muyoyeta M, Ayles H, Hogeweg L, Peters-Bax L, van Ginneken B. Detection of tuberculosis using digital chest radiography: automated reading vs. interpretation by clinical officers. *Int J Tuberc Lung Dis* 2013; **17**(12): 1613-20.

23. Special Programme for TDR SCI. Determining the local calibration of computer-assisted detection (CAD) thresholds and other parameters. Geneva: WHO, 2021.

24. FIND. Digital Chest Radiography and Computer-aided Detection (CAD) Solutions for Tuberculosis Diagnostics: Technology Landscape Analysis. Geneva: FIND, 2021. Available at: <https://www.finddx.org/wp-content/uploads/2021/04/FIND-CXR-CAD-solutions-for-TB-diagnosis-7Apr2021.pdf>.

25. World health Organization. Call for expression of interest by manufacturers of software for computer-aided detection of tuberculosis (CAD) to submit products for WHO expert assessment. Available at: [https://cdn.who.int/media/docs/default-source/hq-tuberculosis/public-calls/cad.developer.submission.requirements.for.who.evaluation.pdf?sfvrsn=3425d4a2\\_3](https://cdn.who.int/media/docs/default-source/hq-tuberculosis/public-calls/cad.developer.submission.requirements.for.who.evaluation.pdf?sfvrsn=3425d4a2_3). Last accessed 13 June 2024.

**Table 1. Summary of demographic and clinical characteristics, overall and by country**

| <b>Characteristics<br/>N (%) unless<br/>otherwise stated</b> | <b>Total</b>     | <b>Philippines</b> | <b>Vietnam</b>         | <b>South<br/>Africa</b> | <b>Uganda</b>          | <b>India</b>           | <b>Tanzania</b>       | <b>Madagascar</b>     |
|--------------------------------------------------------------|------------------|--------------------|------------------------|-------------------------|------------------------|------------------------|-----------------------|-----------------------|
| <b>Total in study<br/>population</b>                         | <b>3,927</b>     | <b>772 (19.7%)</b> | <b>664<br/>(16.9%)</b> | <b>477<br/>(12.2%)</b>  | <b>927<br/>(23.6%)</b> | <b>547<br/>(13.9%)</b> | <b>224<br/>(5.7%)</b> | <b>316<br/>(8.1%)</b> |
| Age<br>Median (IQR)                                          | 41<br>(29-54)    | 41<br>(28-54.5)    | 54<br>(40-64)          | 38<br>(30-49)           | 33<br>(26-42)          | 50<br>(36-61)          | 42.5<br>(32-52)       | 34<br>(25 -50.5)      |
| Male                                                         | 2,133<br>(54.3%) | 342<br>(44.3%)     | 392<br>(59.0%)         | 237<br>(49.7%)          | 544<br>(58.7%)         | 331<br>(60.5%)         | 118<br>(52.9%)        | 169<br>(53.5%)        |
| HIV positive                                                 | 505<br>(12.9%)   | 4<br>(0.5%)        | 4<br>(0.6%)            | 176<br>(37.7%)          | 232<br>(25.0%)         | 14<br>(2.6%)           | 72<br>(32.1%)         | 3<br>(1.0%)           |
| CD4 Count<br>Median (IQR) <sup>1</sup><br>(n=3,387)          | 389<br>(194-673) | 356<br>(120-670)   | 563<br>(497-597)       | 415<br>(214-692)        | 350<br>(178-652)       | 587<br>(155-737)       | -                     | -                     |
| Diabetes <sup>1</sup><br>(n=3,387)                           | 277<br>(8.2%)    | 69<br>(8.9%)       | 84<br>(12.7%)          | 11<br>(2.3%)            | 17<br>(1.8%)           | 96<br>(17.6%)          | -                     | -                     |
| Hemoptysis                                                   | 564<br>(14.4%)   | 53<br>(6.9%)       | 135<br>(20.3%)         | 32<br>(6.7%)            | 159<br>(17.2%)         | 76<br>(13.9%)          | 38<br>(16.9%)         | 71<br>(22.5%)         |
| Fever                                                        | 1,751<br>(44.6%) | 185<br>(24.0%)     | 207<br>(31.2%)         | 166<br>(34.8%)          | 654<br>(70.6%)         | 165<br>(30.2%)         | 139<br>(62.1%)        | 235<br>(74.4%)        |
| Night sweats                                                 | 1,563<br>(39.8%) | 162<br>(21.0%)     | 153<br>(23.0%)         | 268<br>(56.2%)          | 573<br>(61.8%)         | 84<br>(15.4%)          | 117<br>(52.2%)        | 206<br>(65.2%)        |
| Weight loss                                                  | 2,041<br>(52.0%) | 275<br>(35.6%)     | 154<br>(23.2%)         | 289<br>(60.6%)          | 681<br>(73.5%)         | 223<br>(40.8%)         | 133<br>(59.4%)        | 286<br>(90.5%)        |
| Poor appetite <sup>1</sup><br>(n=3,387)                      | 1,240<br>(36.6%) | 236<br>(30.6%)     | 121<br>(18.2%)         | 191<br>(40.0%)          | 488<br>(52.6%)         | 204<br>(37.3%)         | -                     | -                     |

|                                     |                |                |                |                |                |               |               |                |
|-------------------------------------|----------------|----------------|----------------|----------------|----------------|---------------|---------------|----------------|
| Lymphadenopathy*<br>(n=3,387)       | 150<br>(4.4%)  | 20<br>(2.6%)   | 7<br>(1.0%)    | 24<br>(5.0%)   | 95<br>(10.3%)  | 4<br>(0.7%)   | -             | -              |
| History of TB                       | 831<br>(21.2%) | 203<br>(26.3%) | 158<br>(23.8%) | 154<br>(32.3%) | 127<br>(13.7%) | 80<br>(14.6%) | 63<br>(28.1%) | 46<br>(14.6%)  |
| History of contact*<br>(n=3,387)    | 818<br>(24.2%) | 366<br>(47.4%) | 45<br>(6.8%)   | 103<br>(21.6%) | 254<br>(27.4%) | 50<br>(9.1%)  | -             | -              |
| History of smoking<br>(last 7 days) | 798<br>(20.3%) | 245<br>(31.7%) | 99<br>(14.9%)  | 223<br>(46.8%) | 107<br>(11.5%) | 28<br>(5.1%)  | 33<br>(14.7%) | 63<br>(19.9%)  |
| Microbiologically-<br>confirmed TB  | 897<br>(22.8%) | 82<br>(10.6%)  | 201<br>(30.3%) | 90<br>(18.9%)  | 308<br>(33.2%) | 50<br>(9.1%)  | 35<br>(15.6%) | 131<br>(41.5%) |
| Xpert Ultra positive                | 832<br>(21.2%) | 70<br>(9.1%)   | 187<br>(28.2%) | 84<br>(17.6%)  | 297<br>(32.0%) | 49<br>(9.0%)  | 24<br>(10.7%) | 121<br>(38.3%) |
| Trace                               | 32<br>(3.9%)   | 2<br>(2.9%)    | 8<br>(4.3%)    | 7<br>(8.3%)    | 7<br>(2.4%)    | 4<br>(8.2%)   | 1<br>(4.2%)   | 3<br>(2.5%)    |
| Very Low                            | 101<br>(12.1%) | 16<br>(22.9%)  | 28<br>(15.0%)  | 13<br>(15.5%)  | 23<br>(7.7%)   | 11<br>(22.5%) | 5<br>(20.8%)  | 5<br>(4.1%)    |
| Low                                 | 232<br>(27.9%) | 24<br>(34.3%)  | 68<br>(36.4%)  | 20<br>(23.8%)  | 68<br>(22.9%)  | 18<br>(36.7%) | 12<br>(50.0%) | 22<br>(18.2%)  |
| Medium                              | 197<br>(23.7%) | 15<br>(21.4%)  | 42<br>(22.5%)  | 24<br>(28.6%)  | 84<br>(28.3%)  | 10<br>(20.4%) | 2<br>(8.3%)   | 20<br>(16.5%)  |
| High                                | 270<br>(32.5%) | 13<br>(18.6%)  | 41<br>(21.9%)  | 20<br>(23.8%)  | 115<br>(38.7%) | 6<br>(12.2%)  | 4<br>(16.7%)  | 71<br>(58.7%)  |

IQR: interquartile range; TB: tuberculosis

1. Data unavailable from Tanzania and Madagascar, and denominator indicated

**Table 2. Head-to-head accuracy of each CAD algorithm**

| <b>CAD Algorithm</b> | <b>AUC (95% CI)</b>    | <b>Threshold of positivity<sup>1</sup></b> | <b>Sensitivity % (95% CI)<sup>2</sup></b> | <b>Specificity % (95% CI)</b> | <b>Difference in Specificity vs. CAD4TB % (95% CI)</b> | <b>p-value</b> |
|----------------------|------------------------|--------------------------------------------|-------------------------------------------|-------------------------------|--------------------------------------------------------|----------------|
| <b>CAD4TB</b>        | 0.819<br>(0.806-0.831) | ≥36.31                                     | 90%<br>(87.8-91.9)                        | 73.8%<br>(72.2-75.4)          | -                                                      | -              |
| <b>qXR</b>           | 0.801<br>(0.789-0.814) | ≥0.289                                     | 90%<br>(87.8-91.9)                        | 70.3%<br>(68.7-72.0)          | 3.5%<br>(2.2%, 4.8%)                                   | < 0.001        |
| <b>INSIGHT CXR</b>   | 0.800<br>(0.787-0.813) | ≥8.25                                      | 90%<br>(87.8-91.9)                        | 70.0%<br>(68.4-71.7)          | 3.8%<br>(2.3%, 5.2%)                                   | < 0.001        |
| <b>DrAid</b>         | 0.789<br>(0.776-0.802) | ≥0.2149                                    | 90%<br>(87.8-91.9)                        | 67.9%<br>(66.2-69.5)          | 5.9%<br>(4.3%, 7.5%)                                   | < 0.001        |
| <b>Genki</b>         | 0.774<br>(0.762-0.787) | ≥0.06667                                   | 90.1%<br>(87.9-92.0)                      | 64.8%<br>(63.1-66.5)          | 9.0%<br>(7.4%, 10.5%)                                  | < 0.001        |

AUC: Area under the receiver operating characteristic (ROC) curve; CAD: Computer-Aided Detection

1. TB risk scores ranged from 0-100 for CAD4TB and INSIGHT CXR, and 0-1 for qXR, DrAid and Genki
2. Threshold based on a target sensitivity of 90%, and calculated on the total dataset (defined as “universal threshold”)



**Figure 1. Flowchart of Participants**

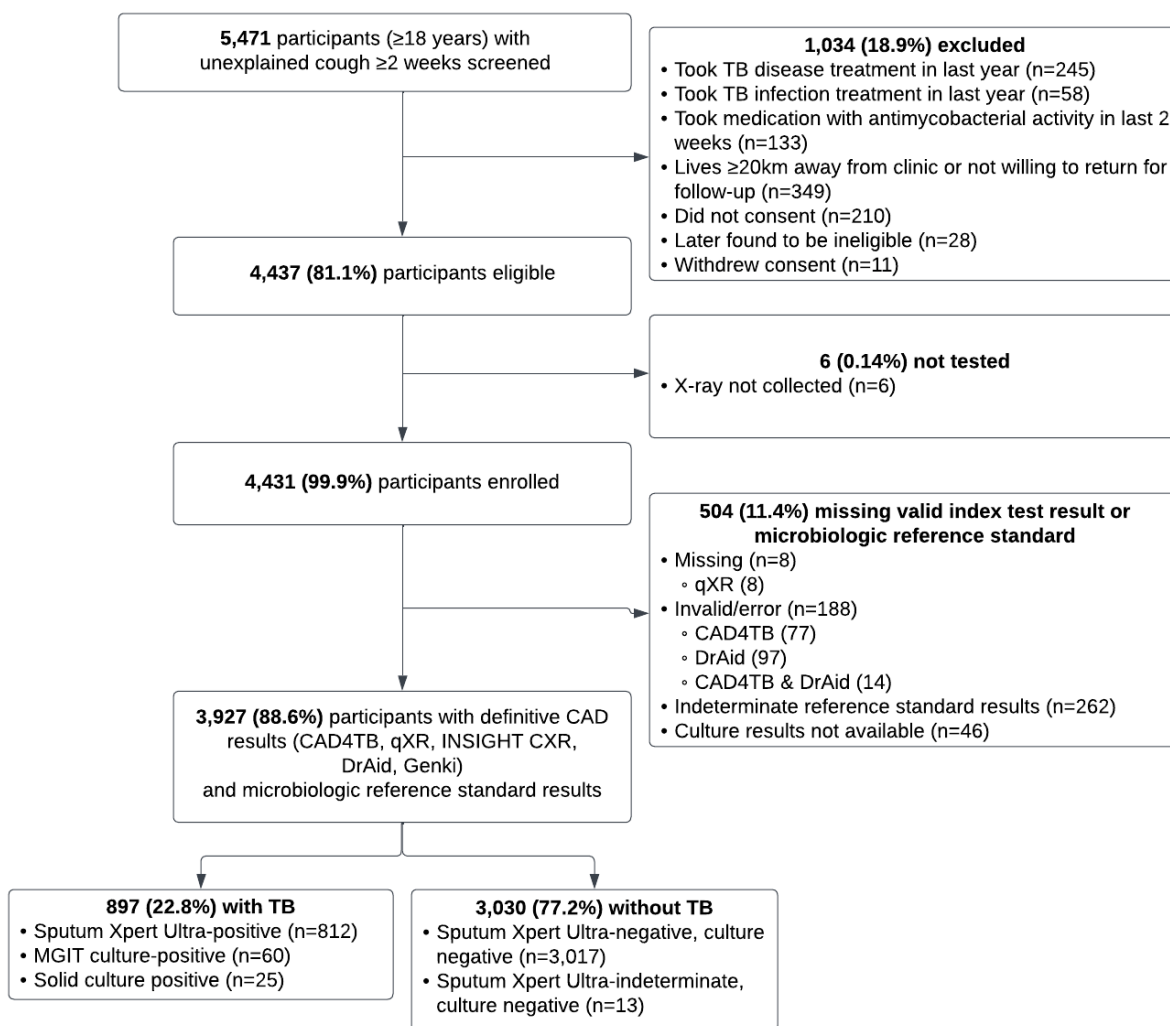

**Figure 2. Receiver operating characteristic curve of each CAD Algorithm.** Each ROC curve represents a CAD algorithm as indicated in the legend, with reported area under the curve (AUC). The red horizontal and vertical lines indicate minimum target sensitivity and specificity for a TB triage test at 90% and 70%, respectively.

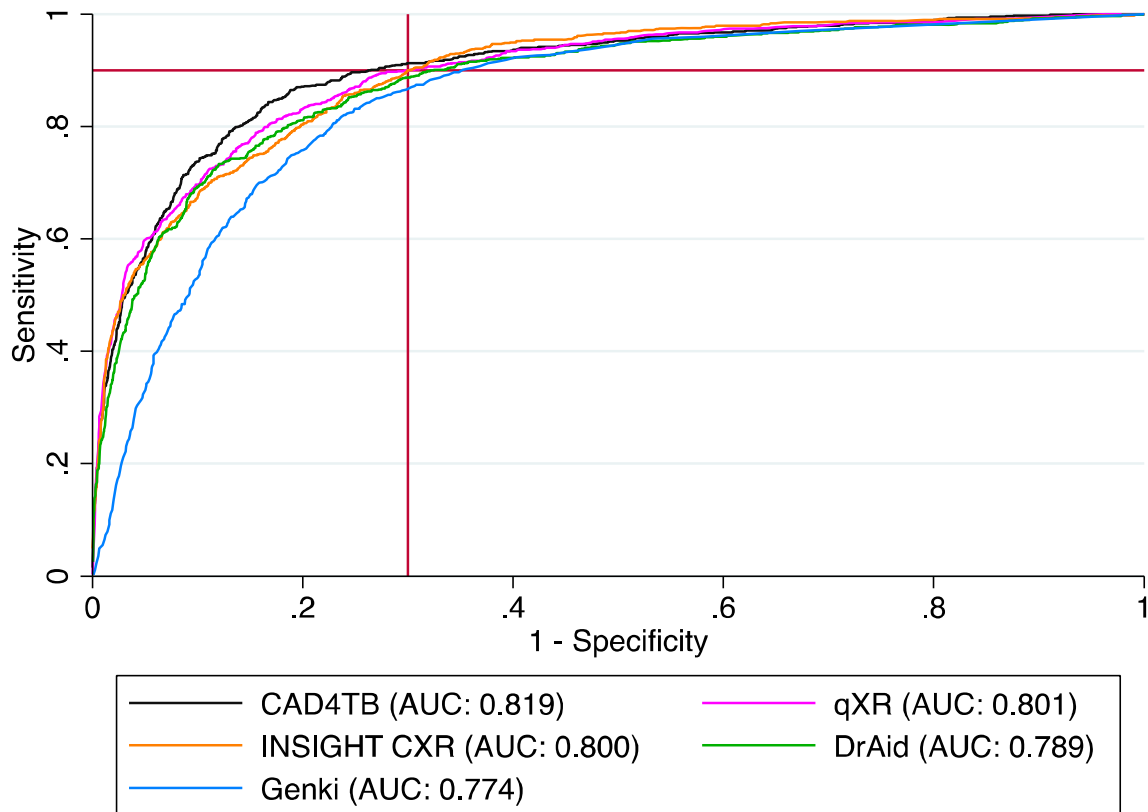

**Figure 3. Forest plot of the sensitivity and specificity of CAD4TB by country and subgroup using a universal threshold.** (A) The sensitivity and specificity by country, with 95% CIs; (B) The sensitivity and specificity by subgroup, with 95% CIs. The overall accuracy of the CAD algorithm is listed at the bottom with a vertical dashed red line, in order to compare the overall estimate to the country and subgroup estimates.

**A.**

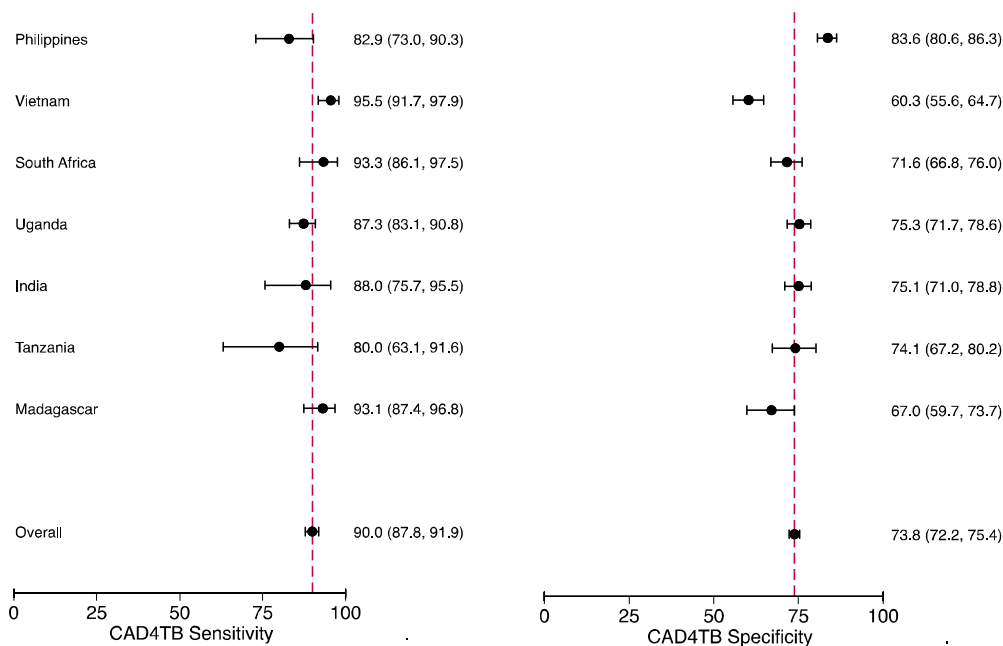

**B.**

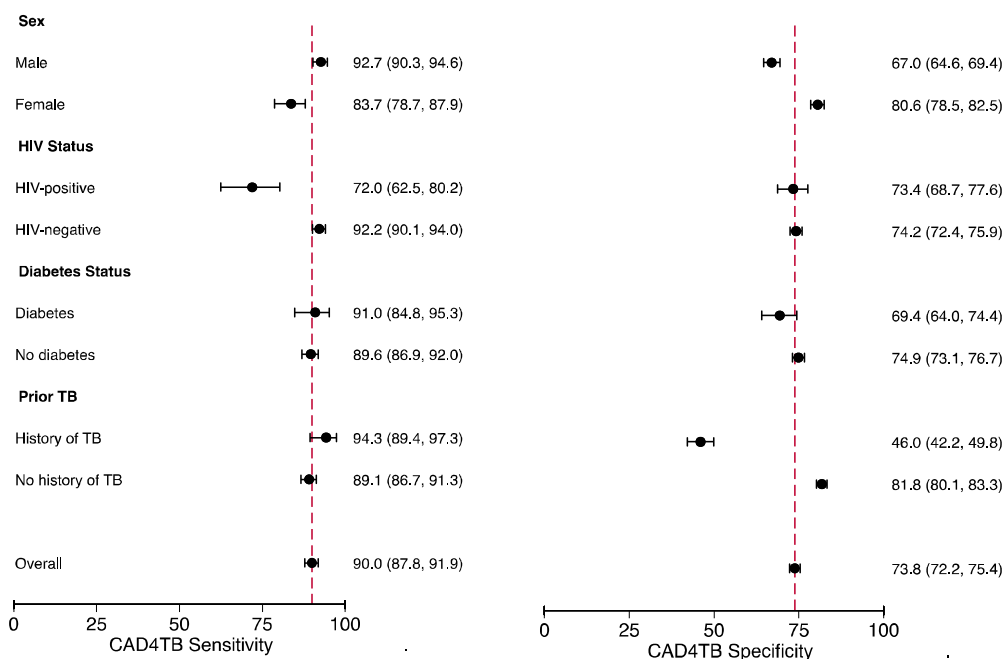

**Figure 4. Forest plot of the sensitivity and specificity of CAD4TB by country and subgroup using country- and population-specific thresholds. (A) The sensitivity and specificity by country, with 95% CIs; and (B) The sensitivity and specificity by subgroup, with 95% CIs. Of note, the threshold selected is based on a 90% sensitivity. The overall accuracy of the CAD algorithm is listed at the bottom with a vertical dashed red line, in order to compare the overall estimate to the country and subgroup estimates.**

**A.**

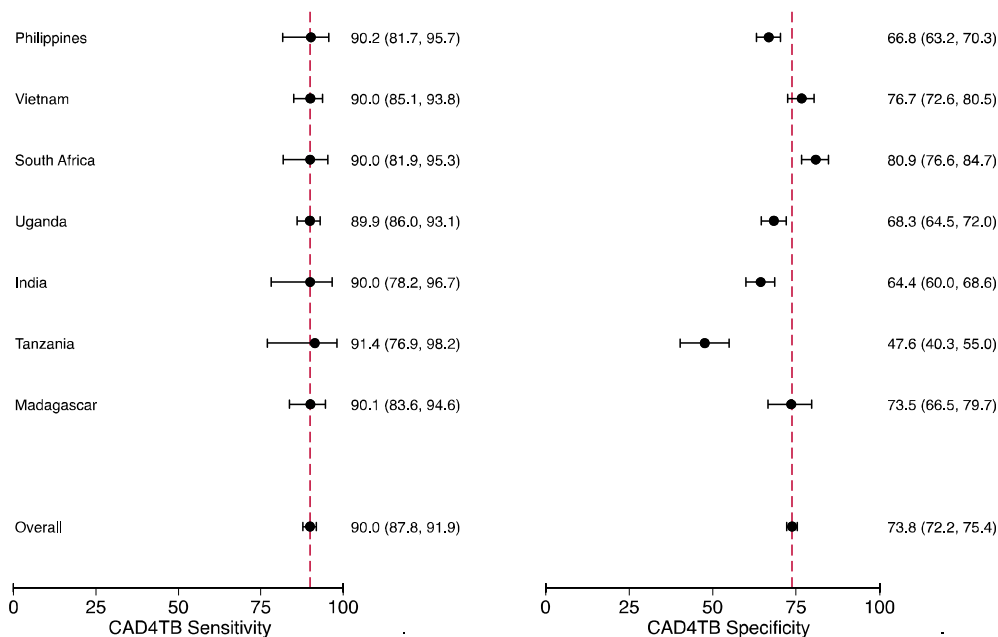

**B.**

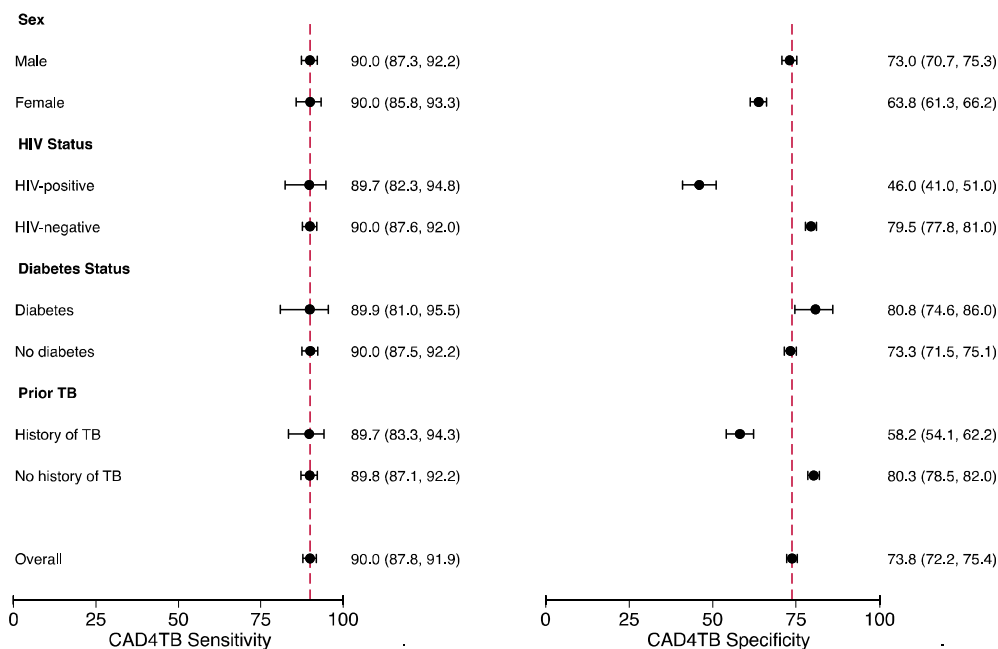

Source: https://medrxiv.org/content/10.1101/2024.06.19.24309061v1.full.pdf
